# Supplementary material for: Nonlinear Mixed-Effects Modeling to Characterize the Pharmacokinetics of a Novel Mithramycin Analogue for Ewing Sarcoma in Mice
Source: Research Square preprint supplement (doi:10.21203/rs.3.rs-9035594/v1), 2026-04-02
Supplement: Supplementary file 1 [file 2ec24801ae2dc7931195d110.docx]

**Supplementary Materials**

**Table S1.** Summary data used for model development.

| **Dose (mg/kg)** | **No. of mice** | **No. of observations** |
| --- | --- | --- |
| 0.3 | 8 | 24 |
| 1 | 20 | 37 |
| 3 | 21 | 39 |
| 5 | 10 | 10 |
| 10 | 11 | 11 |
| Total | 70 | 121 |

**Table S2.** Summary data used for model development.

| **Model** | **- 2LL (OFV)** |
| --- | --- |
| 2 compartment, linear CL  IIV on CL | 2236.62 |
| 1 compartment, linear CL  IIV on CL and V | 2232.57 |
| 1 compartment, linear CL  IIV on CL and V with dose as a covariate on CL | 2206.38 |

**Table S3.** Base population PK model parameters.

| **Parameter** | | **Estimate**  **(%RSE)** | **Bootstrap (n=1000)** | | **Shrinkage (%)** |
| --- | --- | --- | --- | --- | --- |
| **Median** | **95% CI** |
| Fixed effect | |  |  |  |  |
|  | CL (mL/h/kg) | 45.57 (4.89) | 45.75 | 38.96 – 53.65 | - |
|  | V (mL/kg) | 57 (10.2) | 56.03 | 43.84 – 72.51 | - |
| Interindividual variability | | | | |  |
|  | IIV on CL (CV%) | 15 (23.9) | 0.22 | 0.1 – 0.34 | 60.4 |
|  | IIV on V (CV%) | 58 (15.3) | 0.5 | 0.34 – 0.68 | 19.1 |
| Residual variability | | | | |  |
|  | b (%) | 0.44 (9.09) | 0.43 | 0.34 – 0.52 | 18.6 |

| 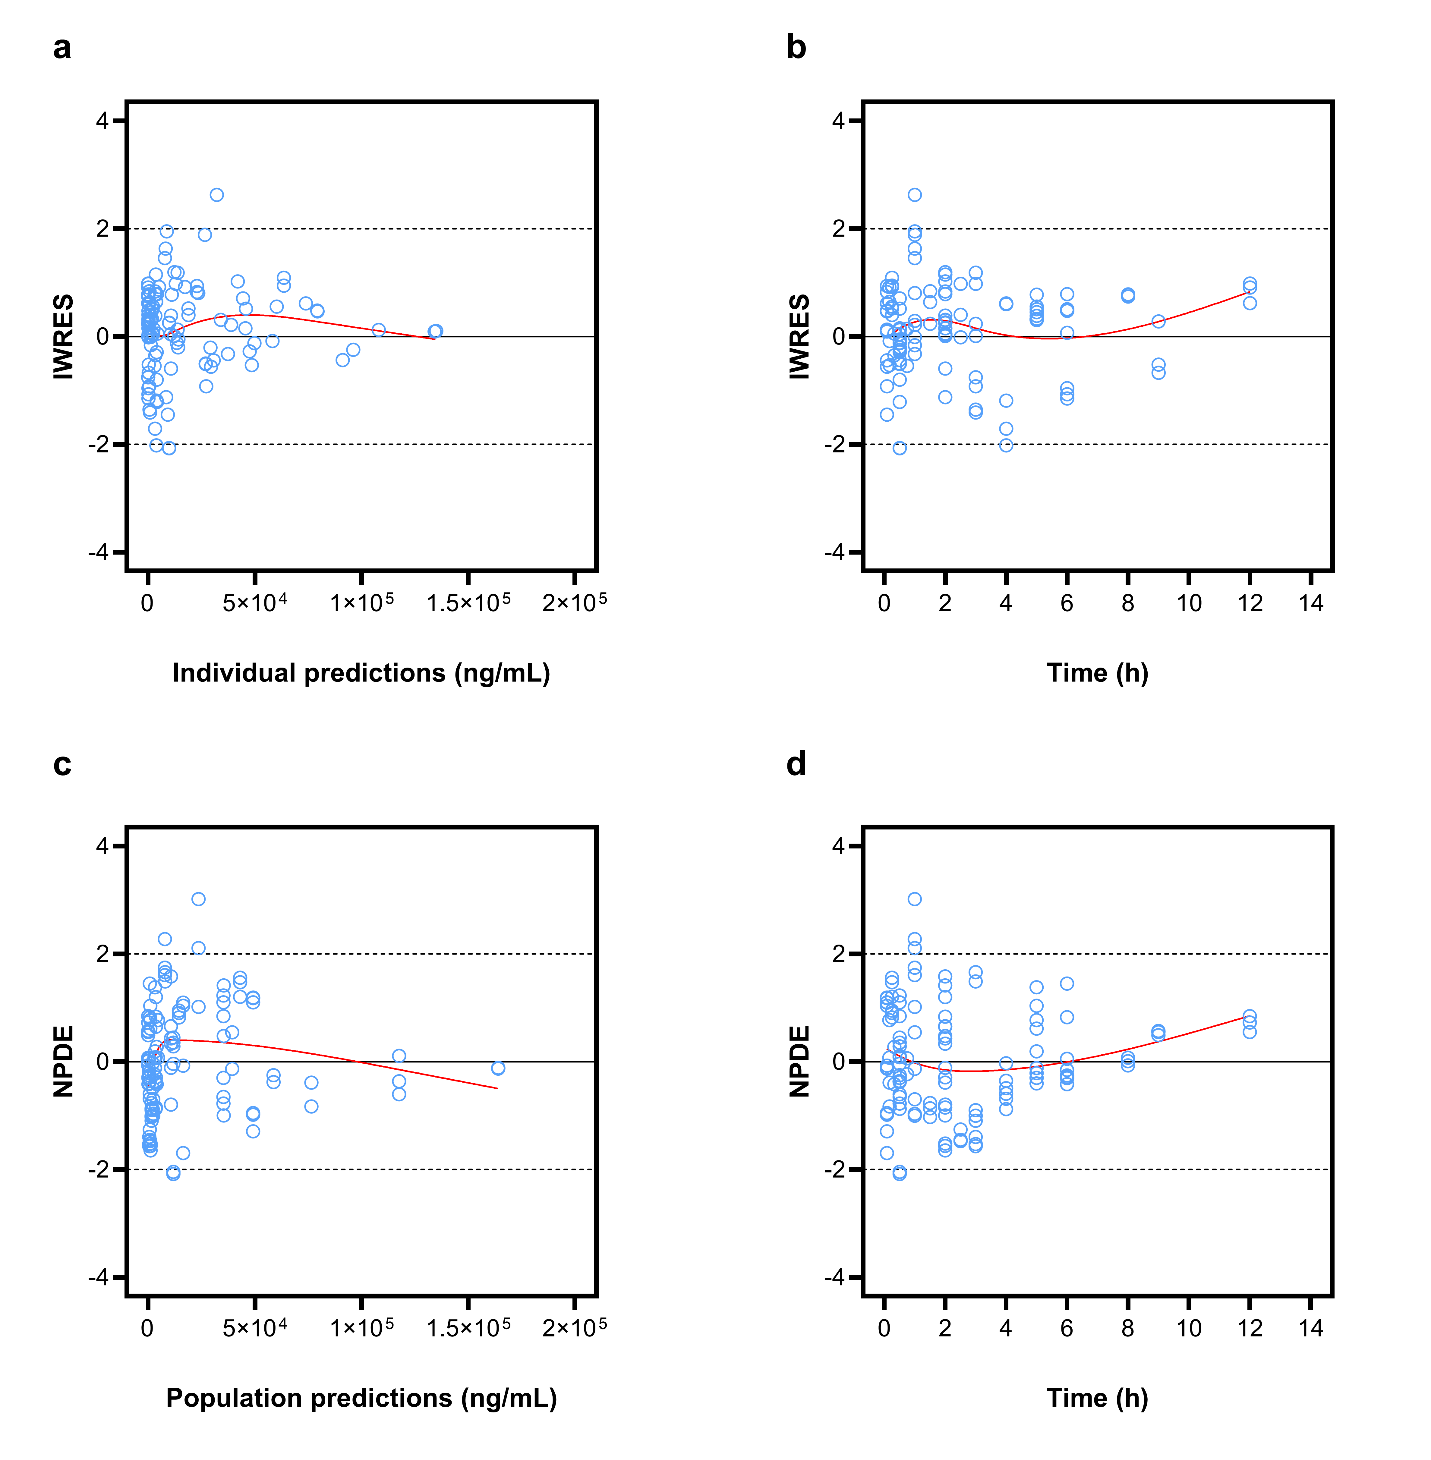 |
| --- |
| **Fig. S1** Goodness-of-fit plots of final popPK model. Panel a and b show individual weighted residuals (IWRES) versus individual predictions and time, respectively. Panel c and d show normalized prediction distribution errors (NPDE) versus population predictions and time, respectively. |

| 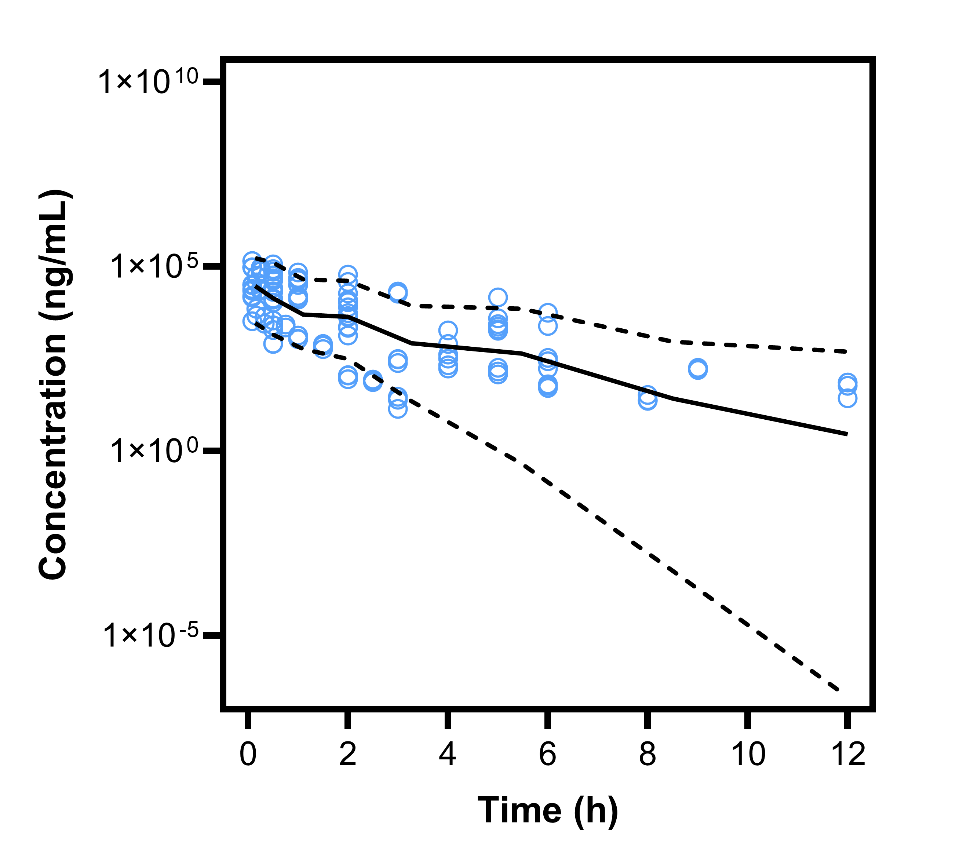 |
| --- |
| **Fig. S2** Visual predictive check of base popPK model following 1000 simulations. Solid line represents median and dashed lines represent 5th and 95th percentiles. Blue circles represent observations. |

| 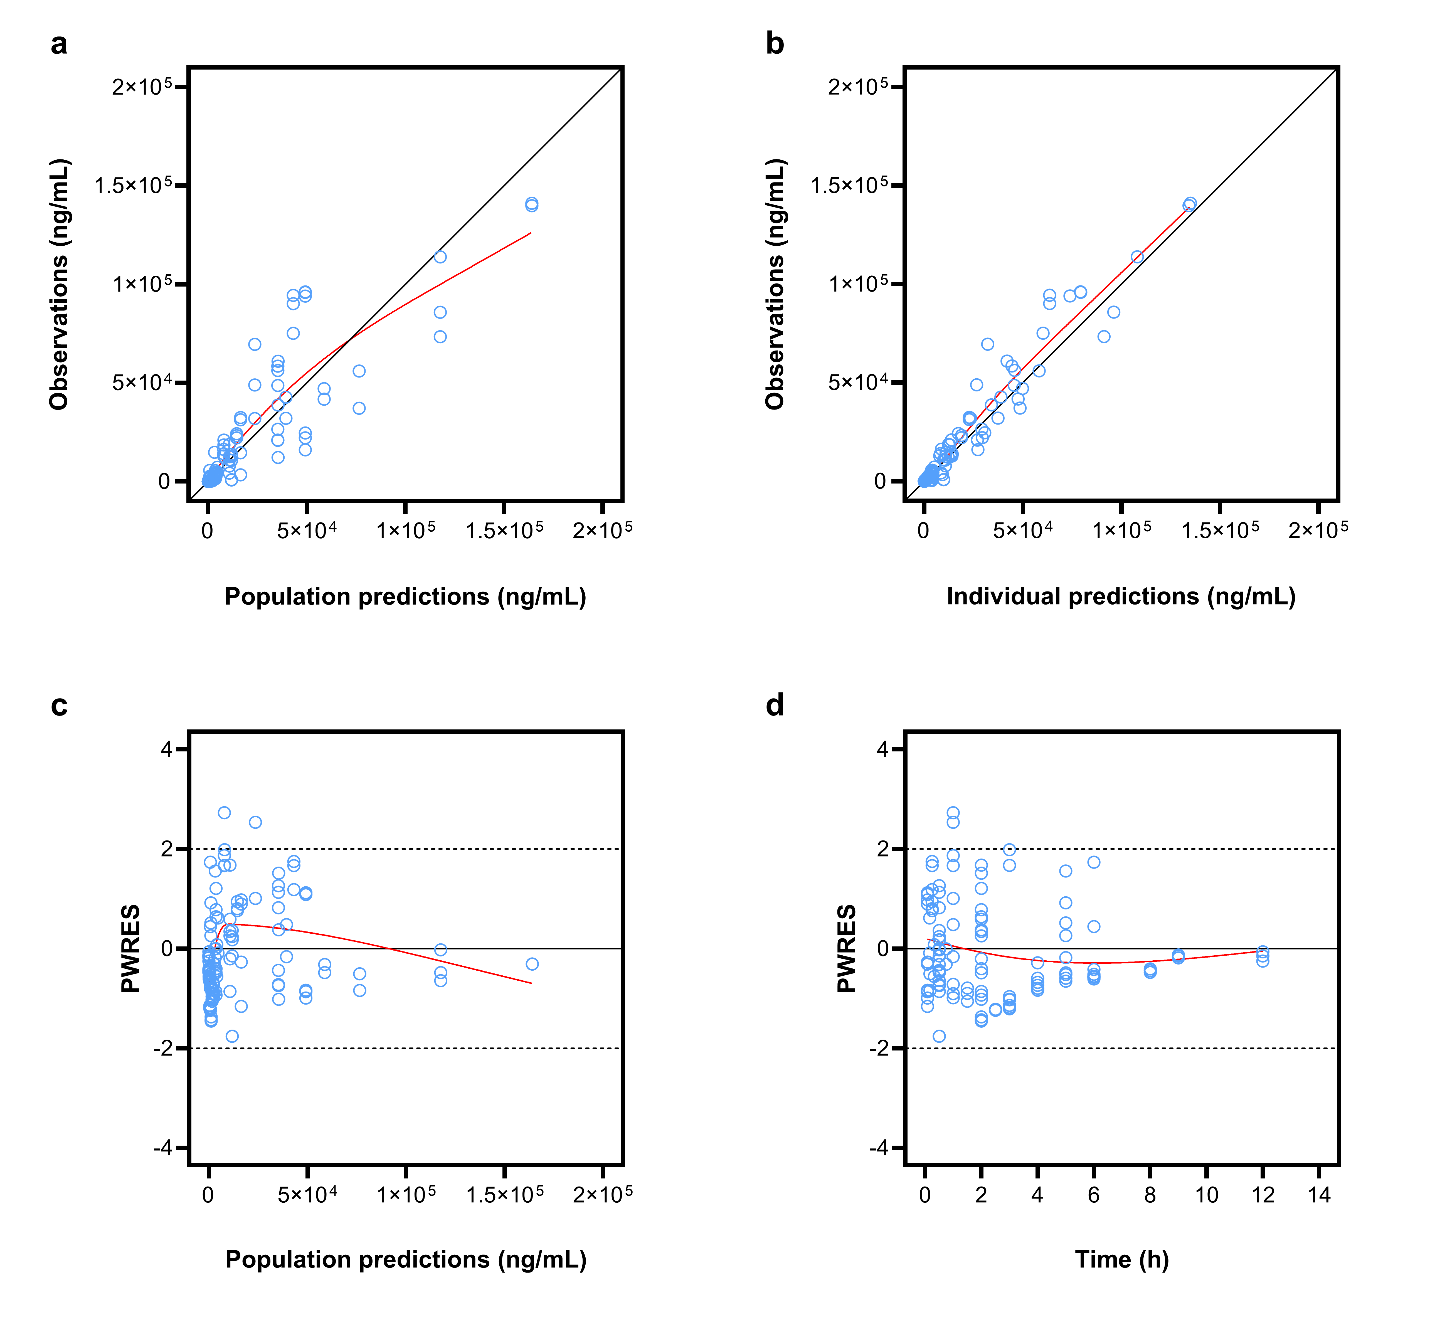 |
| --- |
| **Fig. S3** Goodness-of-fit plots of base popPK model. Panel a and b show the observations versus population (PPRED) and individual predictions (IPRED), respectively. Panel c and d show population weighted residuals (PWRES) versus population predictions and time, respectively. |

| 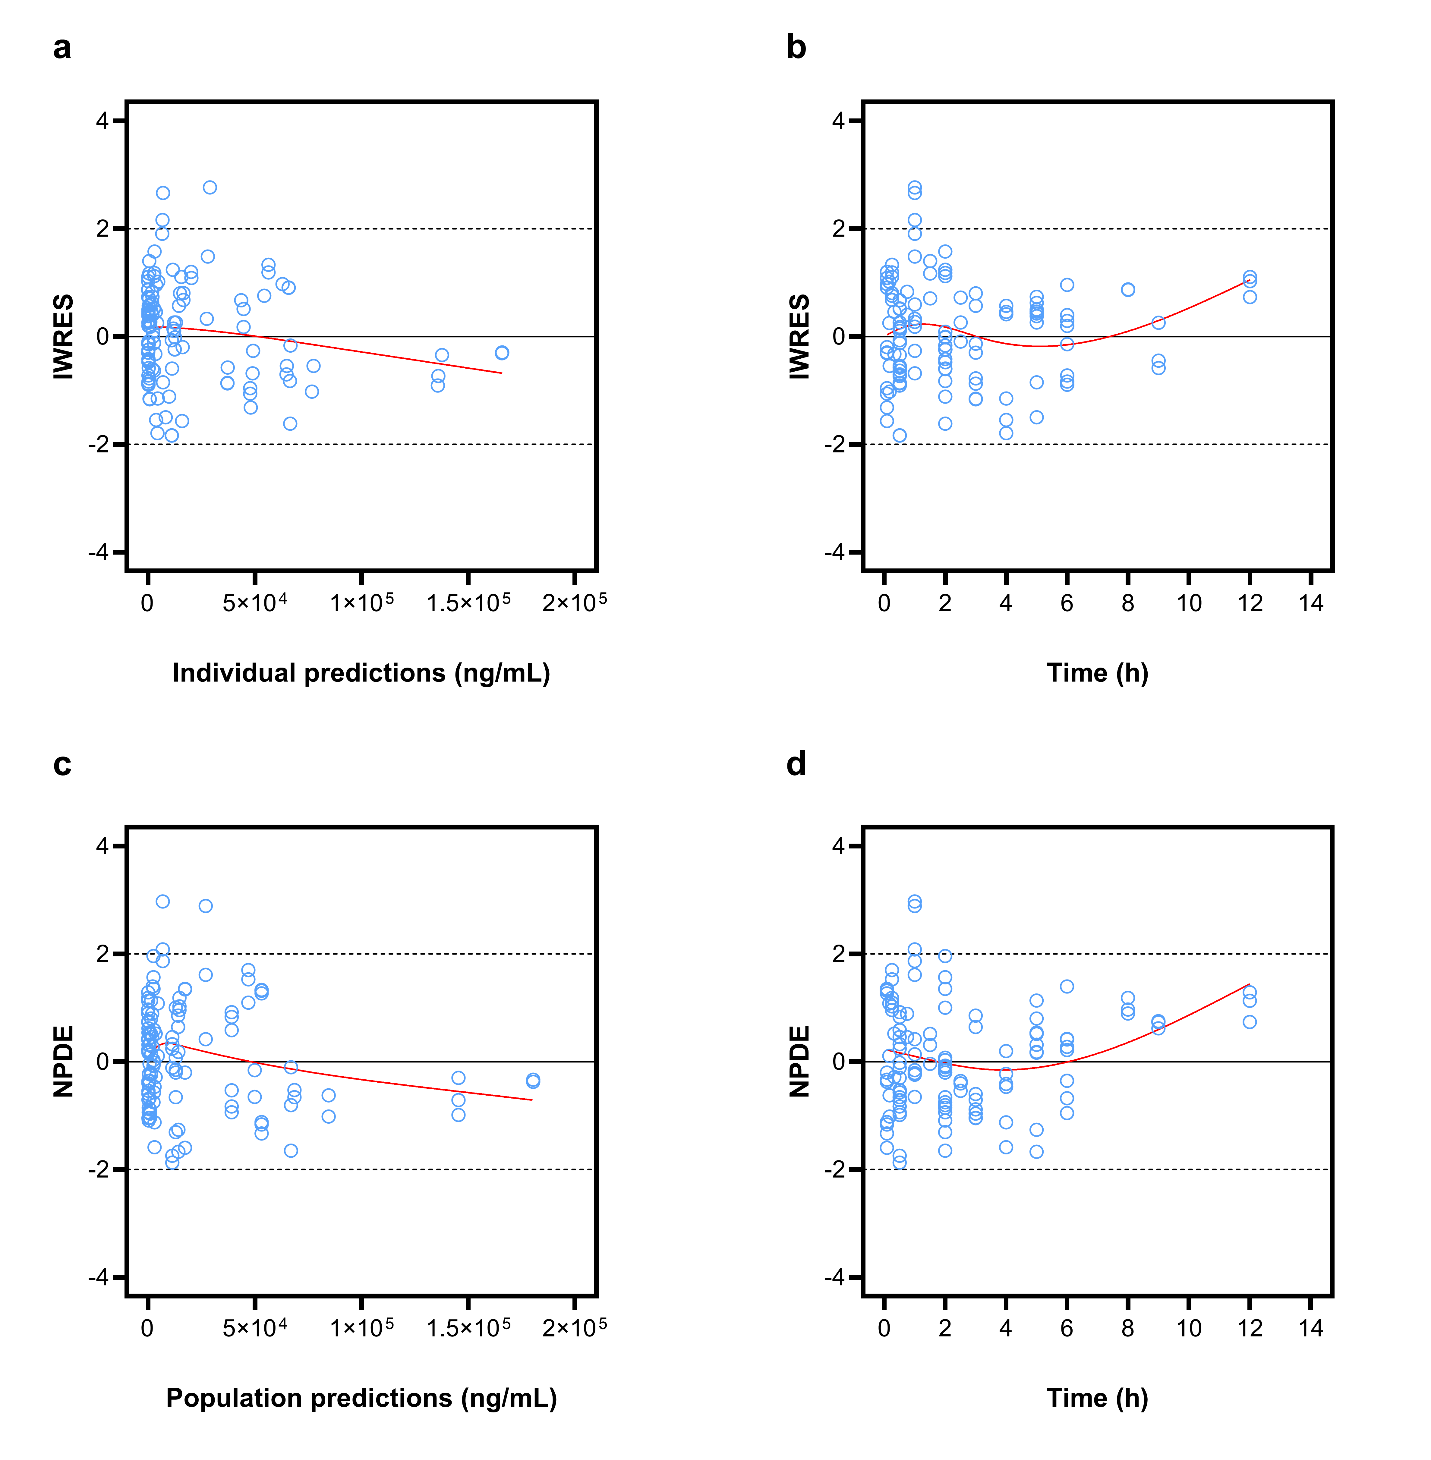 |
| --- |
| **Fig. S4** Goodness-of-fit plots of base popPK model. Panel a and b show individual weighted residuals (IWRES) versus individual predictions and time, respectively. Panel c and d show normalized prediction distribution errors (NPDE) versus population predictions (PPRED) and time, respectively. |
